# Supplementary material for: Highly ordered superstructures of single wall carbon nanotube–liposome complexes
Source: Royal Society of Chemistry journal article supplement (doi:10.1039/c2sm25827g), 2012-01-01
Supplement: c2sm25827g.pdf [file c2sm25827g.pdf]

# Supplementary Information

## Highly Ordered Superstructures of Single Wall Carbon Nanotube-Liposome Complexes

*Tae-Hwan Kim, Changwoo Doe, Shin-Hyun Kang, Min-Jae Lee, Sung-Hwan Lim,  
and Sung-Min Choi\**

### Preparation of *p*-SWNT25

HiPco single wall carbon nanotubes (SWNTs, 2 mg/mL) were mixed with cetyltrimethylammonium 4-vinylbenzoate (CTVB, 5 mg/mL) containing a polymerizable counterion and sodium styrenesulfonate (NaSS) 25 mol % (relative to the CTVB concentration) in heavy water (D<sub>2</sub>O) and then sonicated (Cole-Parmer VCX750, 20 kHz, 750 W) for 1 hour at 60 °C. After sonication, the counterions of the CTVB were polymerized using the VA-044 free radical initiator at 60 °C. To separate the individually isolated SWNTs, the suspension was ultracentrifuged at ca. 111,000g for 4 hours (Beckman XL-100) and the upper ca. 70 % of the solution was decanted. From the UV-vis-NIR absorbance at 744 nm, the concentration of SWNT (0.07 mg/mL) in the decanted *p*-SWNT25 dispersions was estimated by Beer's law<sup>1</sup>. The concentration of CTVB/NaSS surfactant (1.847 mg/mL) was calculated from thermogravimetric analysis (TGA) and the SWNT concentration estimated from the UV-vis-NIR measurement. The decanted *p*-SWNT25 dispersion in water was freeze-dried at -55 °C for 3 days, resulting in a black powder of *p*-SWNT25.

### **<sup>1</sup>H-NMR measurement of *p*-SWNT25**

To characterize the degree of polymerization of CTVB and NaSS molecules for *p*-SWNT25, a series of <sup>1</sup>H NMR measurements (Bruker FT-500 MHz NMR spectrometer) were performed for the unpolymerized and polymerized SWNT/CTVB/NaSS in D<sub>2</sub>O. The <sup>1</sup>H NMR spectrum of the unpolymerized SWNT/CTVB/NaSS is shown in Fig. S1a. The peaks correspond to the protons in the alkyl chain group (1.0 and 1.39 ppm), the 3 methyl groups coupled with nitrogen (2.93 ppm), residual H<sub>2</sub>O (4.8 ppm), the vinyl group (5.17, 5.72, and 6.60 ppm), and the aromatic group (7.25 and 7.83 ppm). Since the counterion (SS<sup>-</sup>) of NaSS molecules is composed of the same aromatic and vinyl groups as that (VB<sup>-</sup>) of CTVB molecules, the spectrum of the unpolymerized SWNT/CTVB/NaSS mixture is very similar to that of unpolymerized SWNT/CTVB mixture<sup>1</sup>. The <sup>1</sup>H-NMR spectrum of the polymerized SWNT/CTVB/NaSS (*p*-SWNT25) is shown in Fig. S1b. It should be noted the peaks arising from the vinyl and aromatic groups of the polymerizable counterions (VB<sup>-</sup> and SS<sup>-</sup> ions) almost completely disappear upon polymerization. This disappearance of peaks is due to the reduced mobility of VB<sup>-</sup> and SS<sup>-</sup> ions upon their polymerization and hence shortened T<sub>2</sub>-relaxation time. This clearly indicates that almost all of VB<sup>-</sup> and SS<sup>-</sup> ions are polymerized, forming stable *p*-SWNT25.

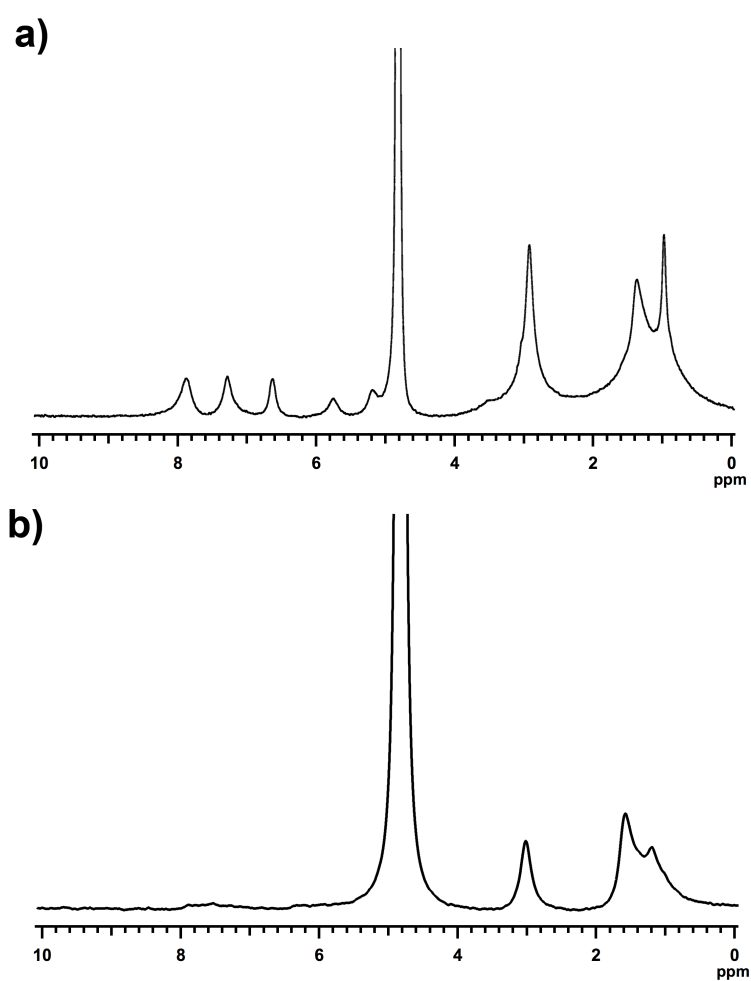

**Fig. S1**  $^1\text{H}$ -NMR spectra of a) unpolymerized SWNT/CTVB/NaSS and b) *p*-SWNT25 in  $\text{D}_2\text{O}$ .

### UV-vis-NIR spectra of *p*-SWNT25 after and before freeze drying

The UV-vis-NIR spectra of the *p*-SWNT25 dispersion in water showed a sharp van Hove transition, which is typical for individually isolated SWNT in solution<sup>2-7</sup> (Fig. S2). The freeze-dried *p*-SWNT25 was easily re-dispersible in water with mild vortexing for a few minutes without forming any visible aggregates. The UV-vis-NIR spectrum of *p*-SWNT25 dispersion as prepared and that of re-dispersed *p*-SWNT25 after freeze drying were essentially identical (Fig. S2), indicating the excellent re-dispersibility of *p*-SWNT25.

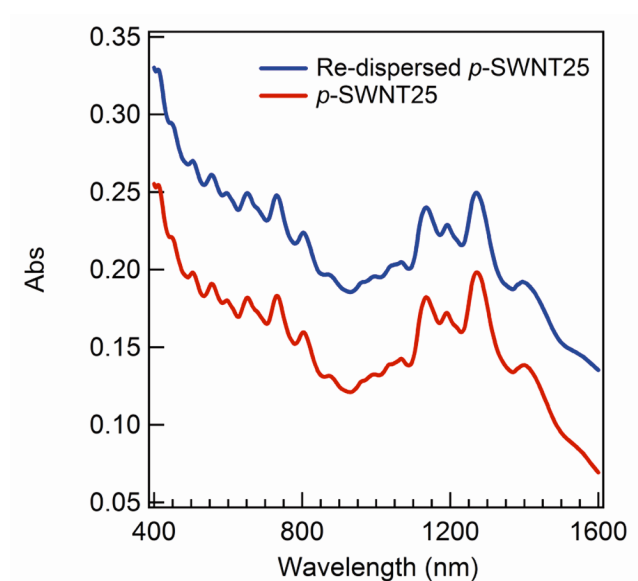

**Fig. S2** UV-vis-NIR spectra of *p*-SWNT25 before and after freeze drying. The spectrum of the re-dispersed *p*-SWNT25 is shifted vertically for visual clarity.

### Determination of the isoelectric points of *p*-SWNT25-CL complexes

The zeta potentials of *p*-SWNT25-cationic liposome (CL) complexes ( $\Phi_{\text{DOPE}} = 0.33, 0.5, 0.67, 0.75, 0.8, \text{ and } 0.85$ ) for various CL/*p*-SWNT25 mass ratios (L/S) were measured. As the L/S mass ratio increases, the zeta potential changes its sign from negative to positive, from which the isoelectric points of *p*-SWNT25-CL complexes are determined, as indicated by blue dotted lines in Fig. S3. The dynamic light scattering measurements of the *p*-SWNT25-CL complexes show that they form large aggregates at the isoelectric points (Fig. S4).

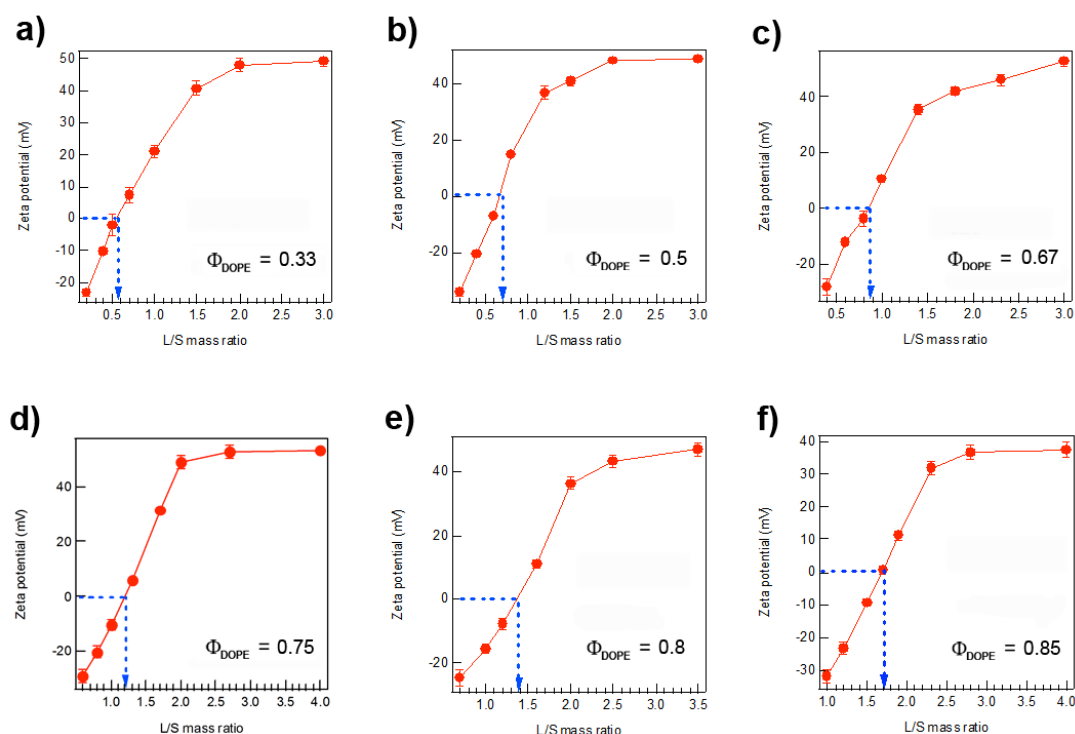

**Fig. S3** Zeta potentials of *p*-SWNT25-CL complexes at various L/S mass ratios.  $\Phi_{\text{DOPE}} =$  a) 0.33, b) 0.5, c) 0.67, d) 0.75, e) 0.8, and f) 0.85.

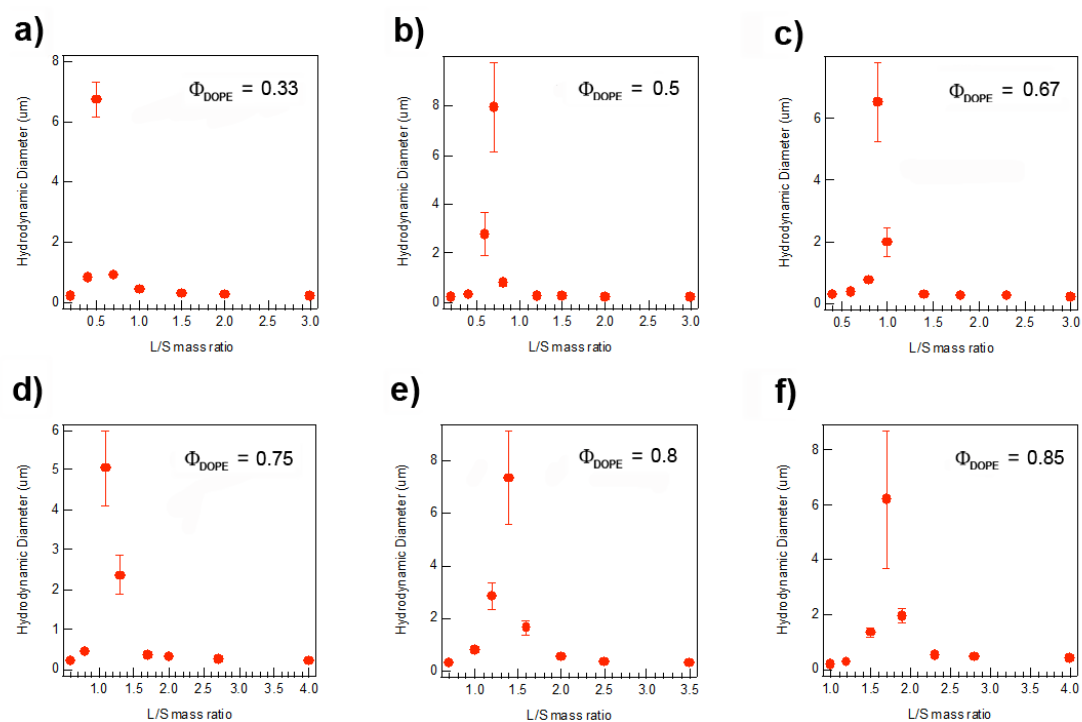

**Fig. S4** Hydrodynamic diameters of *p*-SWNT25-CL complexes at various L/S mass ratios.

$\Phi_{\text{DOPE}}$  = a) 0.33, b) 0.5, c) 0.67, d) 0.75, e) 0.8, and f) 0.85.

### Structure of *p*-SWNT25

The structure of *p*-SWNT25 was confirmed by atomic force microscopy (AFM) measurements as shown in Fig. S5. The diameter distribution of bare SWNTs (which are obtained by burning the *p*-SWNT25 for 4 hr at 330 °C to remove CTVB/NaSS layer absorbed on SWNT) is peaked at  $(1 \pm 0.1)$  nm, and diameters less than 2 nm occupy 90% of the distribution, which indicates that *p*-SWNT25s are dispersed in an isolated form or in a very small bundle (Fig. S5a). The diameter distribution of *p*-SWNT25s is peaked at  $(5 \pm 0.1)$  nm, and 87% of the distribution is in the range of 4.4–5.6 nm (Fig. S5b). The polymerized surfactant shell thickness of the *p*-SWNT25s, which is determined from the diameter distributions of bare SWNT (ca. 1 nm) and *p*-SWNT25 (ca. 5 nm), is about 2 nm. The length distribution of the *p*-SWNT25 is peaked at  $(500 \pm 50)$  nm with a mean length of ca. 500 nm (Fig. S5c). This result is consistent with the AFM result of *p*-SWNTs<sup>1</sup> (functionalized SWNTs fabricated in the exactly same procedure as *p*-SWNT25, except that NaSS was not added.).

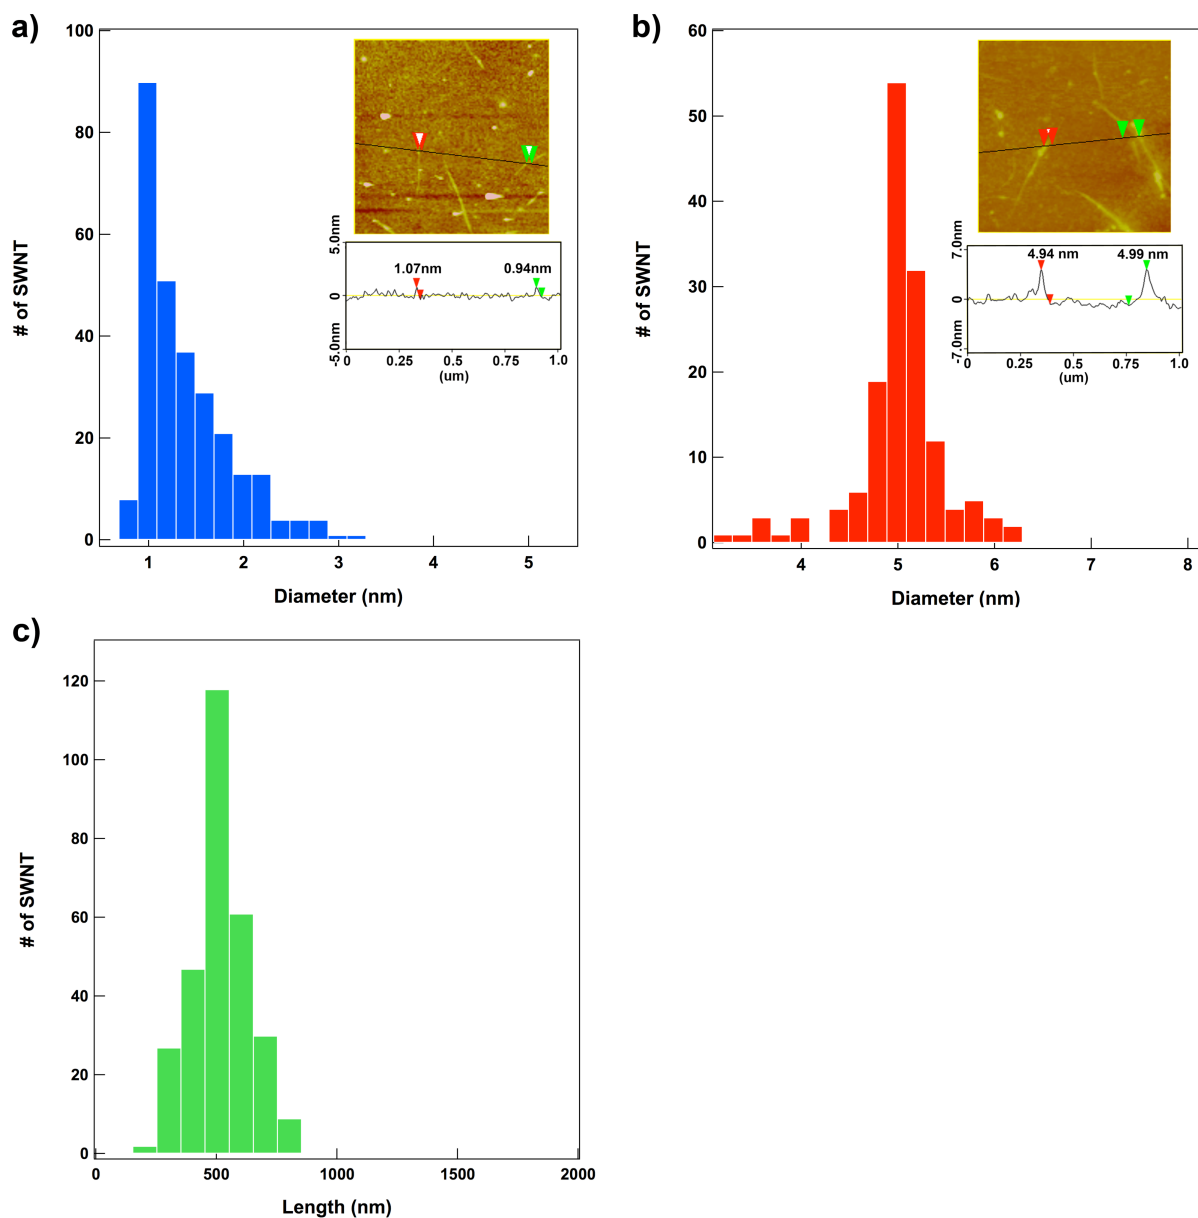

**Fig. S5** The diameter distributions of a) the bare SWNTs and b) *p*-SWNT25s. c) The length distribution of *p*-SWNT25s. The insets are AFM images (1  $\mu\text{m} \times 1 \mu\text{m}$ ) and sectional analyses of a) bare SWNTs and b) *p*-SWNT25s.

## Reference

- 1 T.-H. Kim, C. Doe, S. R. Kline, S.-M. Choi, *Adv. Mater.* 2007, **19**, 929.
- 2 M. J. O'Connell, S. M. Bachilo, C. B. Huffman, V. C. Moore, M. S. Strano, E. H. Haroz, K. L. Rialon, P. J. Boul, W. H. Noon, C. Kittrell, J. Ma, R. H. Hauge, R. B. Weisman, R. E. Smalley, *Science* 2002, **297**, 593.
- 3 A. M. Rao, E. Richter, S. Bandow, B. Chase, P. C. Eklund, K. A. Williams, S. Fang, K. R. Subbaswamy, M. Menon, A. Thess, R. E. Smalley, G. Dresselhaus, M. S. Dresselhaus, *Science* 1997, **275**, 187.
- 4 X. Zhang, T. Liu, T. V. Sreekumar, S. Kumar, V. C. Moore, R. H. Hauge, R. E. Smalley, *Nano Lett.* 2003, **3**, 1285.
- 5 V. C. Moore, M. S. Strano, E. H. Haroz, R. H. Hauge, R. E. Smalley, *Nano Lett.* 2003, **3**, 1379.
- 6 A. G. Ryabenko, T. V. Dorofeeva, G. I. Zvereva, *Carbon* 2004, **42**, 1523.
- 7 A. Di Crescezo, D. Demurtas, A. Renzetti, G. Siani, P. De Maria, M. Meneghetti, M. Prato, A. Fontana, *Soft Matter* 2009, **5**, 62.
